# Supplementary material for: Luminescence color tuning and energy transfer properties in (Sr,Ba)2LaGaO5:Bi3+,Eu3+solid solution phosphors: realization of single-phased white emission for WLEDs
Source: Royal Society of Chemistry journal article supplement (doi:10.1039/c9tc04938j), 2019-01-01
Supplement: c9tc04938j1.pdf [file c9tc04938j1.pdf]

## Supporting Information

# Luminescence color tuning and energy transfer properties in $(\text{Sr},\text{Ba})_2\text{LaGaO}_5:\text{Bi}^{3+},\text{Eu}^{3+}$ solid solution phosphors: realization of single-phased white emission for WLEDs

Dongjie Liu,<sup>a,b</sup> Peipei Dang,<sup>a,b</sup> Xiaohan Yun,<sup>c</sup> Guogang Li,<sup>\*,c</sup> Hongzhou Lian,<sup>a</sup> and Jun Lin<sup>\*,a,b,d</sup>

<sup>a</sup>State Key Laboratory of Rare Earth Resource Utilization, Changchun Institute of Applied Chemistry, Chinese Academy of Sciences, Changchun 130022, P. R. China. E-mail: jlin@ciac.ac.cn

<sup>b</sup>University of Science and Technology of China, Hefei, 230026, P. R. China

<sup>c</sup>Engineering Research Center of Nano-Geomaterials of Ministry of Education, Faculty of Materials Science and Chemistry, China University of Geosciences, 388 Lumo Road, Wuhan 430074, P. R. China. E-mail: ggli@cug.edu.cn

<sup>d</sup>School of Applied Physics and Materials, Wuyi University, Jiangmen, Guangdong 529020, P. R. China.

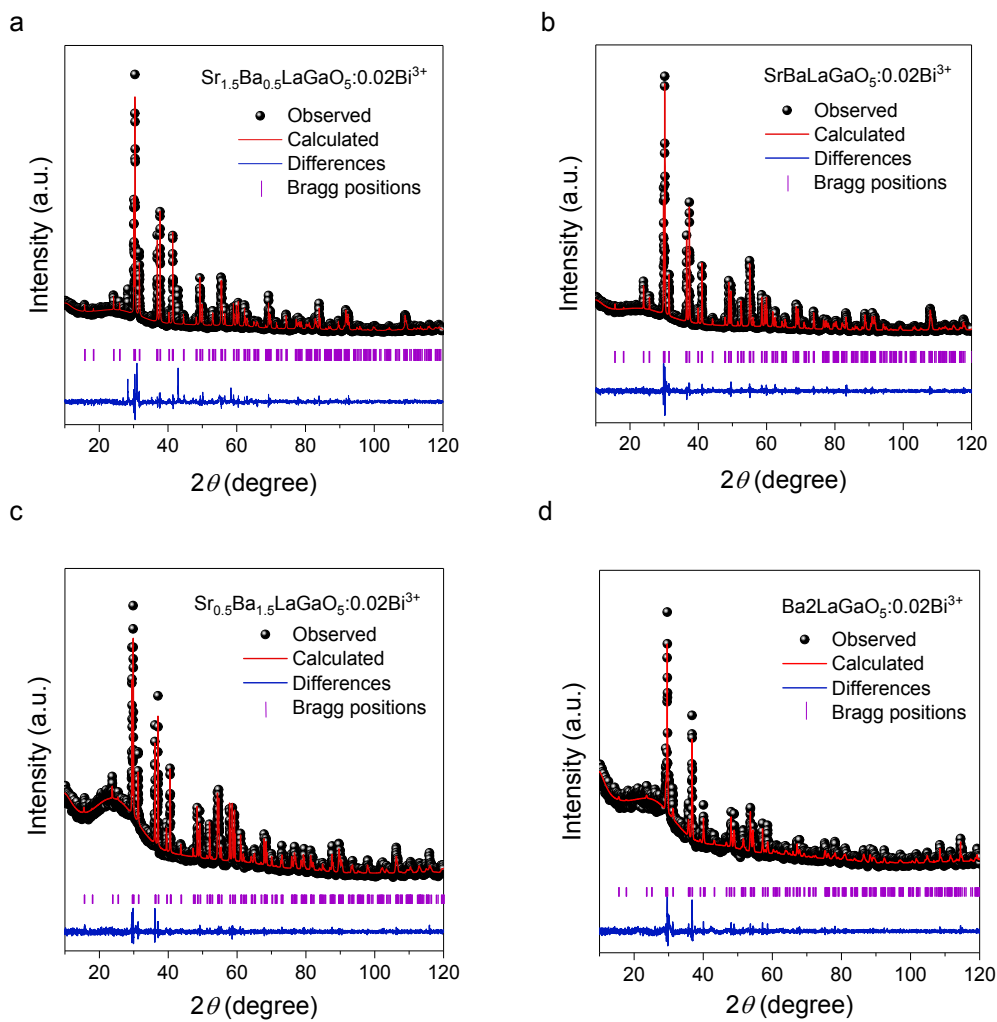

**Fig. S1** Data (black dots) and fitted (red line) powder XRD patterns as well as the difference profile (blue line) for Rietveld analysis of (a)  $\text{Sr}_{1.5}\text{Ba}_{0.5}\text{LaGaO}_5:0.02\text{Bi}^{3+}$ , (b)  $\text{Sr}_{1.0}\text{Ba}_{1.0}\text{LaGaO}_5:0.02\text{Bi}^{3+}$  (c)  $\text{Sr}_{0.5}\text{Ba}_{0.5}\text{LaGaO}_5:0.02\text{Bi}^{3+}$  and (d)  $\text{Ba}_2\text{LaGaO}_5:0.02\text{Bi}^{3+}$  samples. The short vertical lines show the positions of Bragg reflections of the fitted patterns.

**Table S1.** Final refined structure parameters of  $\text{Sr}_{2-y}\text{Ba}_y\text{LaGaO}_5:0.02\text{Bi}^{3+}$  ( $y = 0-2.0$ ) samples derived from the GSAS refinement of XRD data.

| Samples   | Atom | Site | X        | Y        | Z        | Frac.   | Uiso  |
|-----------|------|------|----------|----------|----------|---------|-------|
| $y = 0$   | La   | 8h   | 0.181000 | 0.680950 | 0        | 0.5000  | 0.95  |
|           | Sr1  | 8h   | 0.179903 | 0.679853 | 0        | 0.4423  | 0.28  |
|           | Sr2  | 4a   | 0        | 0        | 1/4      | 0.9886  | 0.96  |
|           | Ga   | 4b   | 0        | 1/2      | 1/4      | 1.0085  | -0.04 |
|           | O1   | 4c   | 0        | 0        | 0        | 0.7891  | 0.38  |
|           | O2   | 16l  | 0.143713 | 0.643743 | 0.652630 | 0.6550  | 1.29  |
| $y = 0.5$ | La   | 8h   | 0.181000 | 0.680950 | 0        | 0.9137  | 2.61  |
|           | Sr1  | 8h   | 0.161753 | 0.661703 | 0        | 0.0556  | -9.00 |
|           | Sr2  | 4a   | 0        | 0        | 1/4      | 1.3210  | 1.31  |
|           | Ga   | 4b   | 0        | 1/2      | 1/4      | 1.1656  | 0.01  |
|           | O1   | 4c   | 0        | 0        | 0        | 0.6679  | -0.17 |
|           | O2   | 16l  | 0.141937 | 0.641967 | 0.651225 | 0.8466  | -2.66 |
| $y = 1.0$ | La   | 8h   | 0.182216 | 0.682166 | 0        | 0.5000  | 3.97  |
|           | Sr1  | 8h   | 0.179329 | 0.679279 | 0        | -1.5874 | 1.70  |
|           | Sr2  | 4a   | 0        | 0        | 1/4      | -0.8854 | -0.27 |
|           | Ga   | 4b   | 0        | 1/2      | 1/4      | -0.6582 | 0.61  |
|           | O1   | 4c   | 0        | 0        | 0        | -0.5006 | -1.06 |
|           | O2   | 16l  | 0.130770 | 0.630800 | 0.632946 | -0.6150 | -0.43 |
| $y = 1.5$ | La   | 8h   | 0.179141 | 0.679091 | 0        | -1.7957 | 1.70  |
|           | Sr1  | 8h   | 0.170738 | 0.670688 | 0        | -0.7466 | 1.70  |
|           | Sr2  | 4a   | 0        | 0        | 1/4      | -3.5629 | 1.27  |
|           | Ga   | 4b   | 0        | 1/2      | 1/4      | -2.6559 | 2.80  |
|           | O1   | 4c   | 0        | 0        | 0        | -3.6257 | 10.19 |
|           | O2   | 16l  | 0.158934 | 0.658964 | 0.645074 | -1.9722 | 0.81  |

---

|         |     |     |          |          |          |        |       |
|---------|-----|-----|----------|----------|----------|--------|-------|
|         | La  | 8h  | 0.182817 | .682817  | 0        | 0.4919 | 1.41  |
|         | Sr1 | 8h  | 0.187240 | 0.687240 | 0        | 0.5891 | 1.93  |
|         | Sr2 | 4a  | 0        | 0        | 1/4      | 1.0294 | -0.15 |
| y = 2.0 | Ga  | 4b  | 0        | 1/2      | 1/4      | 0.9710 | 6.16  |
|         | O1  | 4c  | 0        | 0        | 0        | 2.1976 | 80.00 |
|         | O2  | 16l | 0.135301 | 0.635301 | 0.645999 | 1.1343 | 8.22  |

---

**Table S2.** Main bond distance of  $\text{Sr}_{2-y}\text{Ba}_y\text{LaGaO}_5:0.02\text{Bi}^{3+}$  ( $y = 0-2.0$ ) samples.

| Samples |         | Bond distance (Å) |         |            |         |            |
|---------|---------|-------------------|---------|------------|---------|------------|
| y = 0   | La-O1   | 2.54182(3)        | Sr1-O1  | 2.54470(3) | Sr2-O1  | 2.81962(6) |
|         | La-O1   | 2.54135(3)        | Sr1-O1  | 2.54423(3) | Sr2-O1  | 2.81962(6) |
|         | La-O2   | 2.84476(3)        | Sr1-O2  | 2.83807(3) | Sr2-O2  | 2.87958(3) |
|         | La-O2   | 2.43195(3)        | Sr1-O2  | 2.43955(3) | Sr2-O2  | 2.87958(3) |
|         | La-O2   | 2.84470(3)        | Sr1-O2  | 2.83801(3) | Sr2-O2  | 2.87958(3) |
|         | La-O2   | 2.84470(3)        | Sr1-O2  | 2.83801(3) | Sr2-O2  | 2.87958(3) |
|         | La-O2   | 2.84476(3)        | Sr1-O2  | 2.83807(3) | Sr2-O2  | 2.87958(3) |
|         | La-O2   | 2.43195(3)        | Sr1-O2  | 2.43955(3) | Sr2-O2  | 2.87958(3) |
|         |         |                   |         |            | Sr2-O2  | 2.87958(3) |
|         |         |                   |         |            | Sr2-O2  | 2.87958(3) |
|         | Average | 2.66575           | Average | 2.66502    | Average | 2.86760    |
| y = 0.5 | La-O1   | 2.53957(3)        | Sr1-O1  | 2.59608(3) | Sr2-O1  | 2.84108(9) |
|         | La-O1   | 2.53910(3)        | Sr1-O1  | 2.59562(3) | Sr2-O1  | 2.84108(9) |
|         | La-O2   | 2.83285(4)        | Sr1-O2  | 2.71897(4) | Sr2-O2  | 2.89309(3) |
|         | La-O2   | 2.44116(4)        | Sr1-O2  | 2.57841(4) | Sr2-O2  | 2.89309(3) |
|         | La-O2   | 2.83280(4)        | Sr1-O2  | 2.71889(4) | Sr2-O2  | 2.89309(3) |
|         | La-O2   | 2.83280(4)        | Sr1-O2  | 2.71889(4) | Sr2-O2  | 2.89309(3) |
|         | La-O2   | 2.83285(4)        | Sr1-O2  | 2.71897(4) | Sr2-O2  | 2.89309(3) |
|         | La-O2   | 2.44116(4)        | Sr1-O2  | 2.57841(4) | Sr2-O2  | 2.89309(3) |
|         |         |                   |         |            | Sr2-O2  | 2.89309(3) |
|         |         |                   |         |            | Sr2-O2  | 2.89309(3) |
|         | Average | 2.66154           | Average | 2.65303    | Average | 2.88269    |

|         |         |            |         |            |         |             |
|---------|---------|------------|---------|------------|---------|-------------|
|         | La-O1   | 2.55274(4) | Sr1-O1  | 2.56033(4) | Sr2-O1  | 2.85719(7)  |
|         | La-O1   | 2.55227(4) | Sr1-O1  | 2.55986(4) | Sr2-O1  | 2.85719(7)  |
|         | La-O2   | 2.68192(3) | Sr1-O2  | 2.66296(3) | Sr2-O2  | 3.03937(4)  |
|         | La-O2   | 2.38851(3) | Sr1-O2  | 2.41053(3) | Sr2-O2  | 3.03937(4)  |
|         | La-O2   | 2.68188(3) | Sr1-O2  | 2.66292(3) | Sr2-O2  | 3.03937(4)  |
| y = 1.0 | La-O2   | 2.68188(3) | Sr1-O2  | 2.66292(3) | Sr2-O2  | 3.03937(4)  |
|         | La-O2   | 2.68192(3) | Sr1-O2  | 2.66296(3) | Sr2-O2  | 3.03937(4)  |
|         | La-O2   | 2.38851(3) | Sr1-O2  | 2.41053(3) | Sr2-O2  | 3.03937(4)  |
|         |         |            |         |            | Sr2-O2  | 3.03937(4)  |
|         |         |            |         |            | Sr2-O2  | 3.03937(4)  |
|         | Average | 2.57620    | Average | 2.57413    | Average | 3.00293     |
|         | La-O1   | 2.59185(7) | Sr1-O1  | 2.61595(7) | Sr2-O1  | 2.87014(13) |
|         | La-O1   | 2.59137(7) | Sr1-O1  | 2.61548(7) | Sr2-O1  | 2.87014(13) |
|         | La-O2   | 2.91177(7) | Sr1-O2  | 2.86112(7) | Sr2-O2  | 2.91404(7)  |
|         | La-O2   | 2.31998(6) | Sr1-O2  | 2.37908(6) | Sr2-O2  | 2.91404(7)  |
|         | La-O2   | 2.91168(7) | Sr1-O2  | 2.86103(7) | Sr2-O2  | 2.91404(7)  |
| y = 1.5 | La-O2   | 2.91168(7) | Sr1-O2  | 2.86103(7) | Sr2-O2  | 2.91404(7)  |
|         | La-O2   | 2.91177(7) | Sr1-O2  | 2.86112(7) | Sr2-O2  | 2.91404(7)  |
|         | La-O2   | 2.31998(6) | Sr1-O2  | 2.37908(6) | Sr2-O2  | 2.91404(7)  |
|         |         |            |         |            | Sr2-O2  | 2.91404(7)  |
|         |         |            |         |            | Sr2-O2  | 2.91404(7)  |
|         | Average | 2.68376    | Average | 2.67924    | Average | 2.90526     |

---

|         |         |             |         |             |         |             |
|---------|---------|-------------|---------|-------------|---------|-------------|
|         | La-O1   | 2.61403(24) | Sr1-O1  | 2.60279(24) | Sr2-O1  | 2.87760(4)  |
|         | La-O1   | 2.61403(24) | Sr1-O1  | 2.60279(24) | Sr2-O1  | 2.87760(4)  |
|         | La-O2   | 2.84582(21) | Sr1-O2  | 2.87499(21) | Sr2-O2  | 3.02447(24) |
|         | La-O2   | 2.48943(19) | Sr1-O2  | 2.45666(19) | Sr2-O2  | 3.02447(24) |
|         | La-O2   | 2.84582(21) | Sr1-O2  | 2.87499(21) | Sr2-O2  | 3.02447(24) |
| y = 2.0 | La-O2   | 2.84582(21) | Sr1-O2  | 2.87499(21) | Sr2-O2  | 3.02447(24) |
|         | La-O2   | 2.84582(21) | Sr1-O2  | 2.87499(21) | Sr2-O2  | 3.02447(24) |
|         | La-O2   | 2.48943(19) | Sr1-O2  | 2.45666(19) | Sr2-O2  | 3.02447(24) |
|         |         |             |         |             | Sr2-O2  | 3.02447(24) |
|         |         |             |         |             | Sr2-O2  | 3.02447(24) |
|         | Average | 2.69878     | Average | 2.70236     | Average | 2.99510     |

---

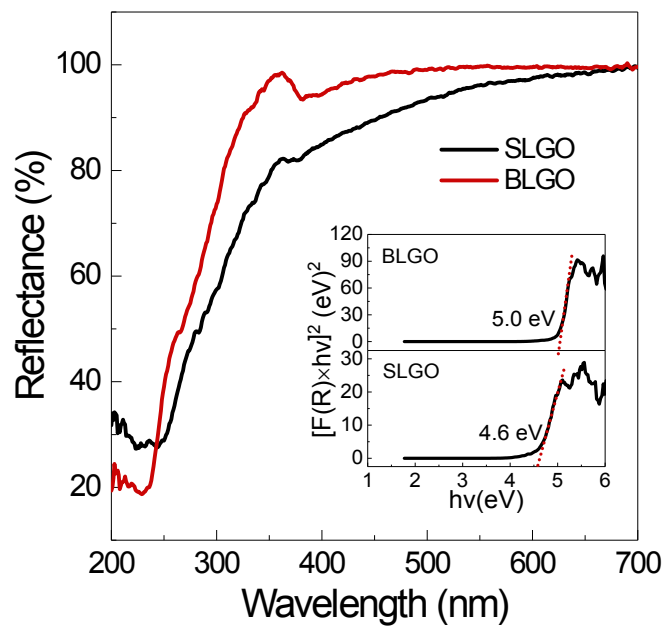

**Fig. S2** Diffuse reflectance spectra of the Sr<sub>2</sub>LaGaO<sub>5</sub> and Ba<sub>2</sub>LaGaO<sub>5</sub> hosts. The inset depicts the band gap energy of the Sr<sub>2</sub>LaGaO<sub>5</sub> and Ba<sub>2</sub>LaGaO<sub>5</sub> hosts.



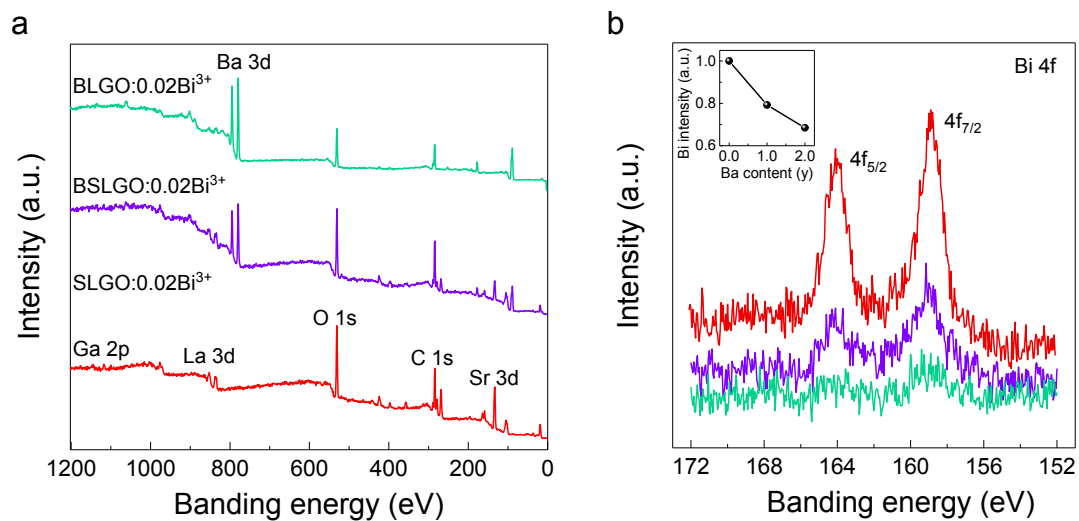

**Fig. S3** (a) The XPS spectra and (b) enlarged peaks of Bi<sup>3+</sup> in Sr<sub>2-y</sub>Ba<sub>y</sub>LaGaO<sub>5</sub>:0.02Bi<sup>3+</sup> ( $y = 0$  (red line),  $y = 1.0$  (blue line),  $y = 2.0$  (green line)). The inset in (b) shows the integrated intensity of Bi<sup>3+</sup> peaks in Sr<sub>2-y</sub>Ba<sub>y</sub>LaGaO<sub>5</sub>:0.02Bi<sup>3+</sup> ( $y = 0, 1.0, 2.0$ ) samples with various Ba<sup>2+</sup> content.

**Table S3.** The IQYs of  $\text{Sr}_{2-y}\text{Ba}_y\text{LaGaO}_5:0.02\text{Bi}^{3+}$  ( $y = 0-2.0$ ) samples.

| $y$ | IQY   |
|-----|-------|
| 0   | 47.3% |
| 0.5 | 31.4% |
| 1.0 | 24.9% |
| 1.5 | 16.7% |
| 2.0 | 14.7% |

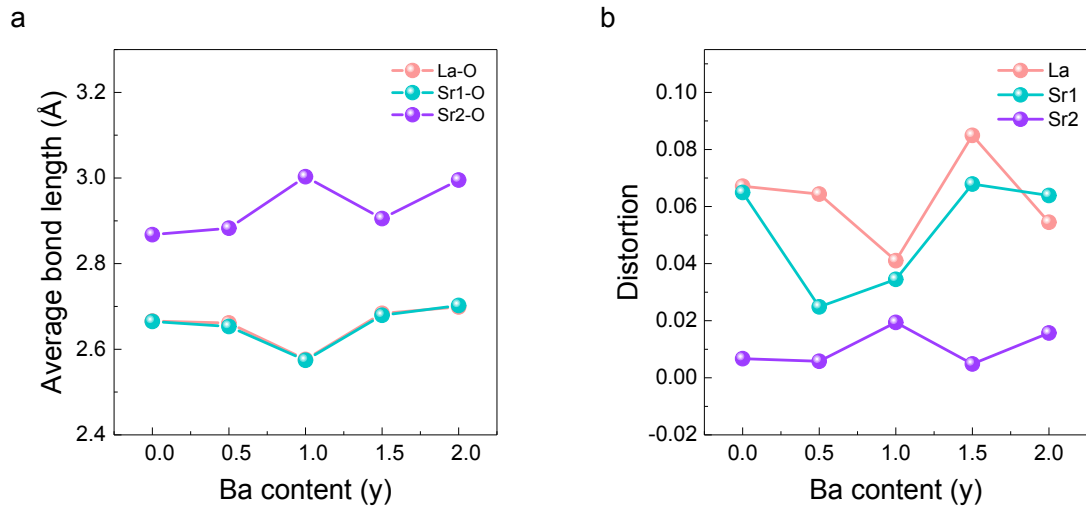

**Fig. S4** (a) Average bond length of La-O, Sr1-O and Sr2-O in  $\text{Sr}_{2-y}\text{Ba}_y\text{LaGaO}_5:0.02\text{Bi}^{3+}$  ( $y = 0-2.0$ ). (b) Distortion of La, Sr1 and Sr2 sites in  $\text{Sr}_{2-y}\text{Ba}_y\text{LaGaO}_5:0.02\text{Bi}^{3+}$  ( $y = 0-2.0$ )

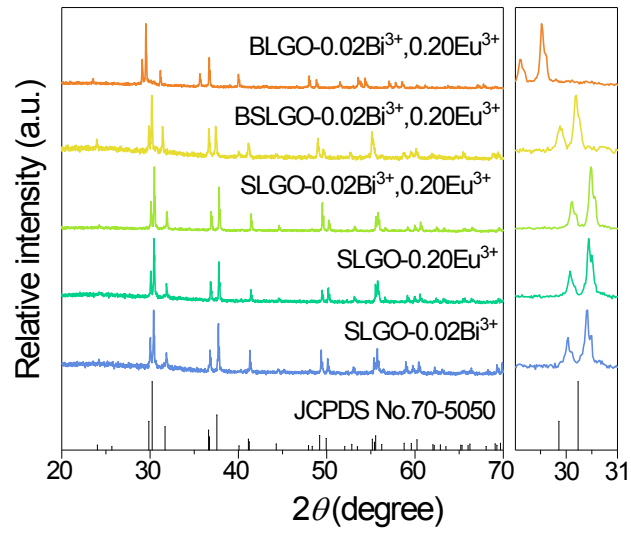

**Fig. S5** XRD patterns of  $\text{Sr}_{2-y}\text{Ba}_y\text{LaGaO}_5:x\text{Bi}^{3+}, z\text{Eu}^{3+}$  ( $x = 0, 0.02$ ;  $y = 0, 1.0, 2.0$ ;  $z = 0, 0.20$ ) samples.

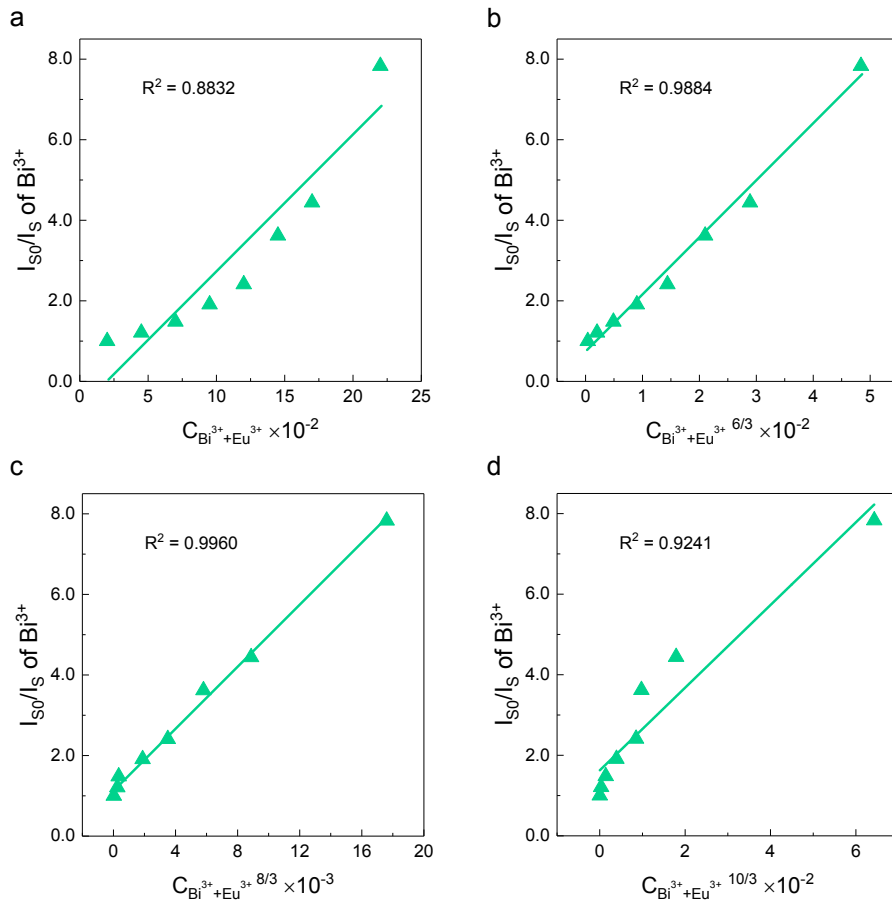

**Fig. S6** Dependence of  $I_{S0}/I_S$  of  $\text{Bi}^{3+}$  on (a)  $C$ , (b)  $C^{6/3}$ , (c)  $C^{8/3}$ , and (d)  $C^{10/3}$  in  $\text{Sr}_2\text{LaGaO}_5:0.02\text{Bi}^{3+}, z\text{Eu}^{3+}$  ( $z = 0-0.20$ ) system.

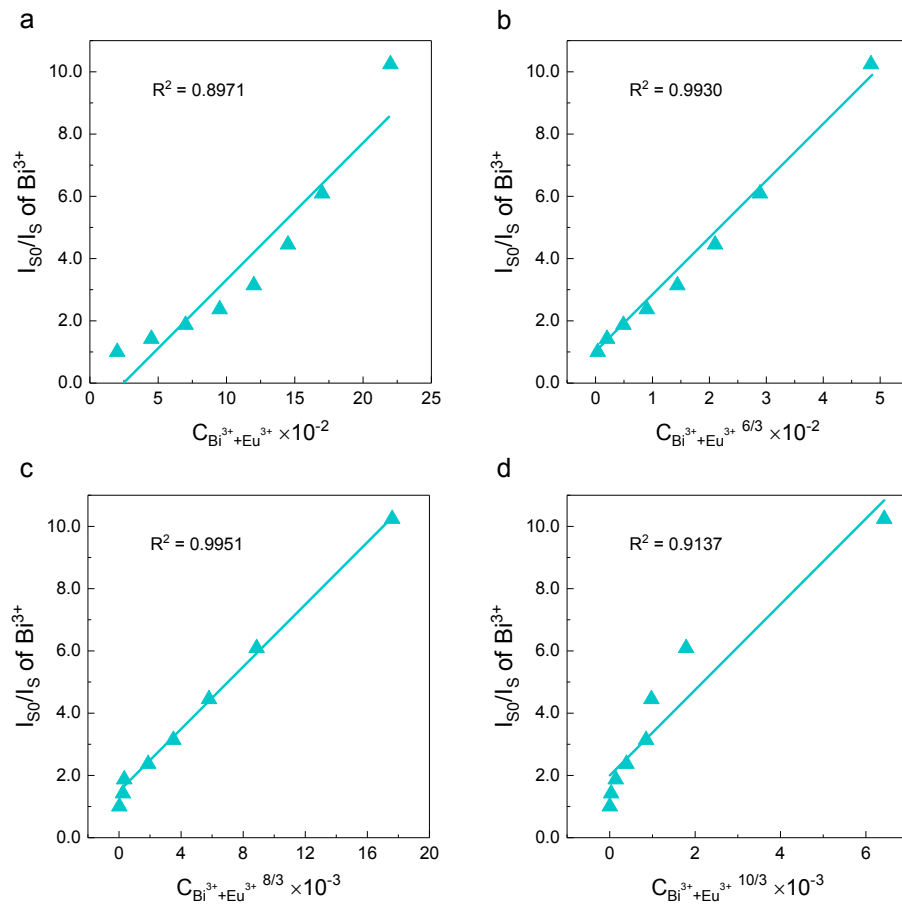

**Fig. S7** Dependence of  $I_{50}/I_s$  of  $\text{Bi}^{3+}$  on (a)  $C$ , (b)  $C^{6/3}$ , (c)  $C^{8/3}$ , and (d)  $C^{10/3}$  in  $\text{SrBaLaGaO}_5:0.02\text{Bi}^{3+}, z\text{Eu}^{3+}$  ( $z = 0-0.20$ ) system.

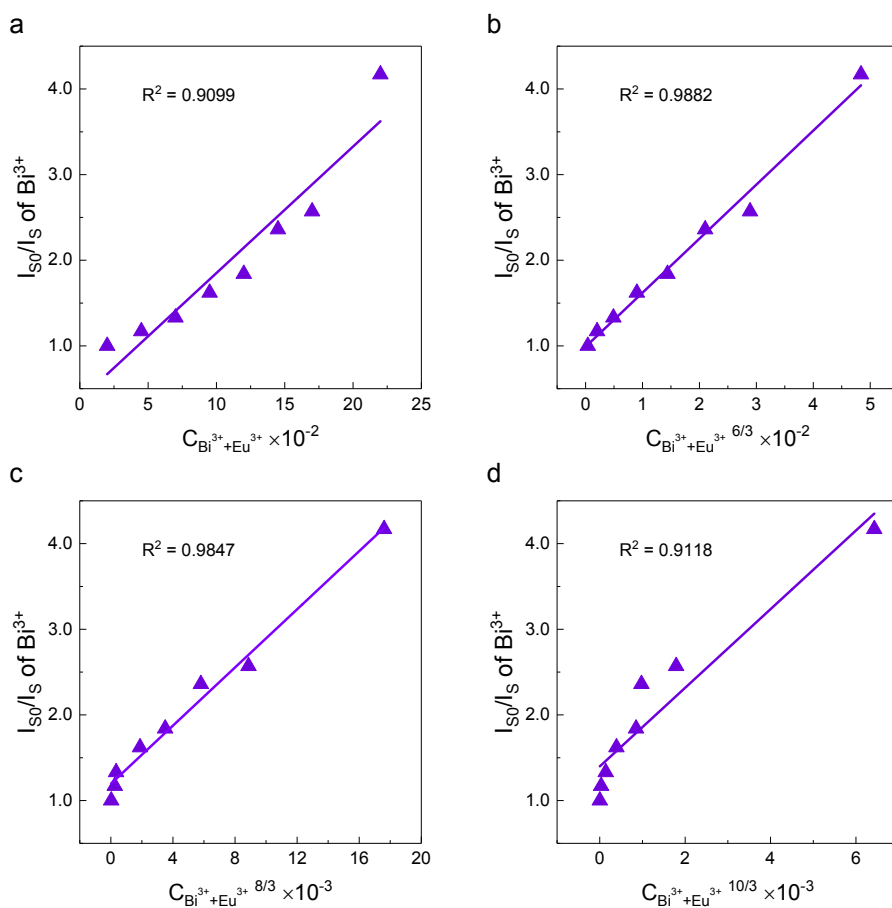

**Fig. S8** Dependence of  $I_{S0}/I_S$  of  $\text{Bi}^{3+}$  on (a)  $C$ , (b)  $C^{6/3}$ , (c)  $C^{8/3}$ , and (d)  $C^{10/3}$  in  $\text{Ba}_2\text{LaGaO}_5:0.02\text{Bi}^{3+}, z\text{Eu}^{3+}$  ( $z = 0-0.20$ ) system.

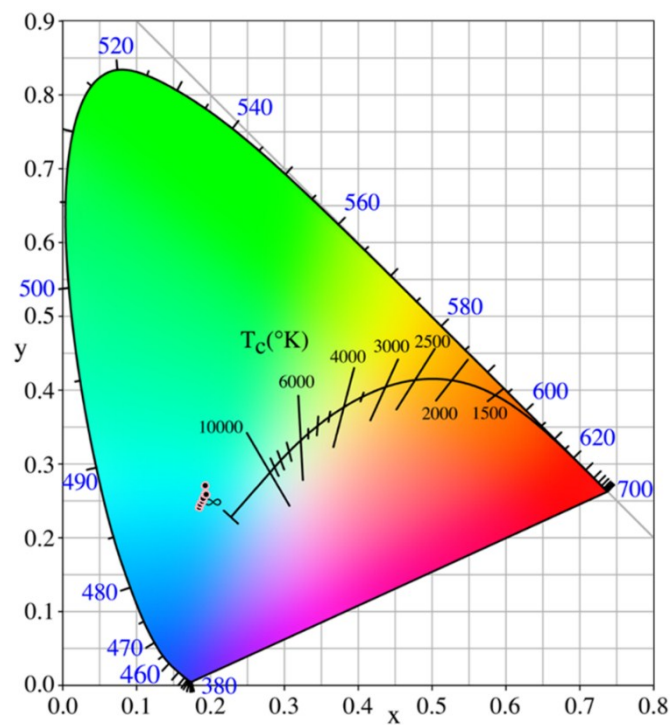

**Fig. S9** The CIE chromaticity coordinates diagram of  $\text{Sr}_2\text{LaGaO}_5:0.02\text{Bi}^{3+}$  phosphor at different temperatures.
